# Supplementary material for: On the supramolecular packing of bent-shaped molecules: the influence of the central bent-core on the liquid crystalline behaviour
Source: Royal Society of Chemistry journal article supplement (doi:10.1039/b9nj00230h), 2009-01-01
Supplement: b9nj00230h.pdf [file b9nj00230h.pdf]

## SUPPORTING INFORMATION

### **On the supramolecular packing of bent-shaped molecules: The influence of the central bent-core on the mesomorphism.**

Nélida Gimeno, María José Clemente, Patricia Forcén,

José Luis Serrano, Maria Blanca Ros\*.

*Química Orgánica. Facultad de Ciencias. Instituto de Ciencia de Materiales de Aragón,  
Universidad de Zaragoza-CSIC. 50009 Zaragoza. Spain.*

## INDEX

- 1. Graphical comparison of imine vs. ester naphthalene series**
- 2. Conformations and theoretical molecular lengths of N(2,7) and N(2,3)**
- 3. Switching curves of N(2,7)**
- 4. DSC curves, x-ray diffractograms and microphotographs of selected compounds.**

## 1. Graphical comparison of imine vs. ester naphthalene series

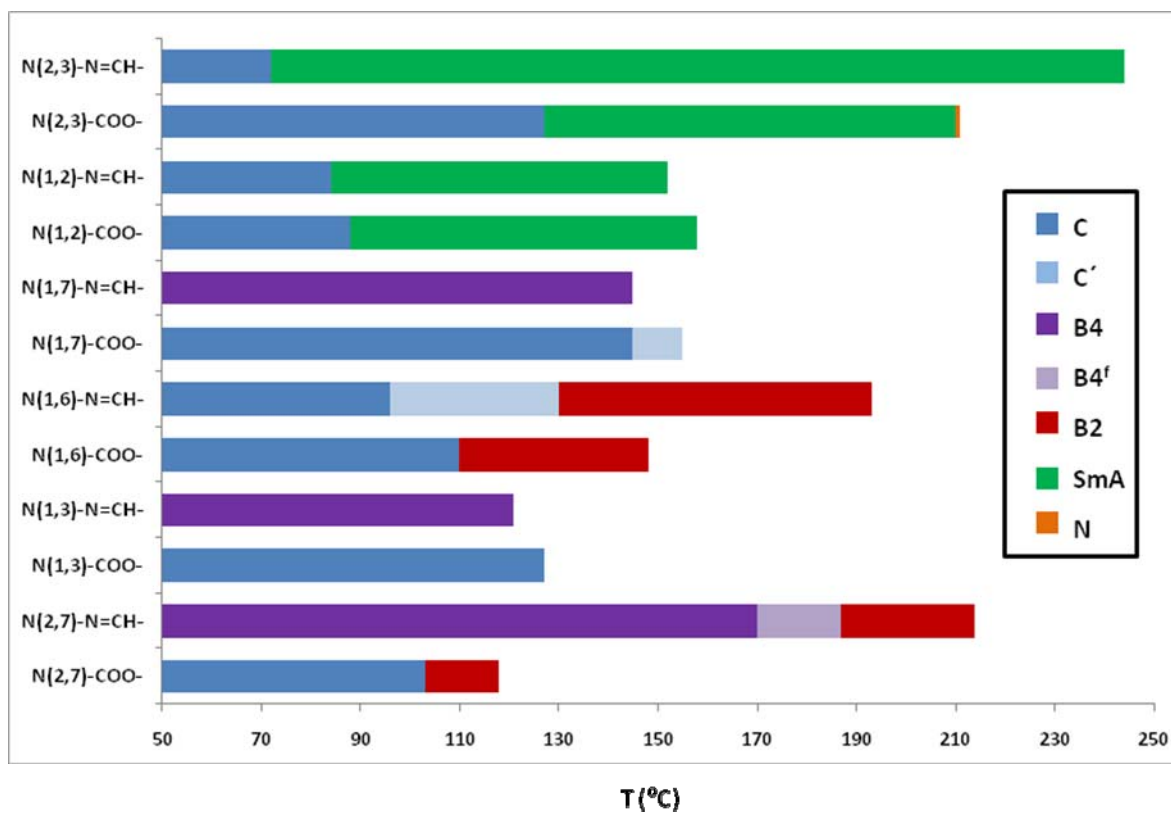

**Fig. 1.** Graphical representation of the two series of compounds containing lateral imine and ester moieties (B2 and SmCP represent the same mesophase) (For imine compounds see Ref. 14b in the main text)

## 2. Conformations and theoretical molecular lengths of N(2,7) and N(2,3)

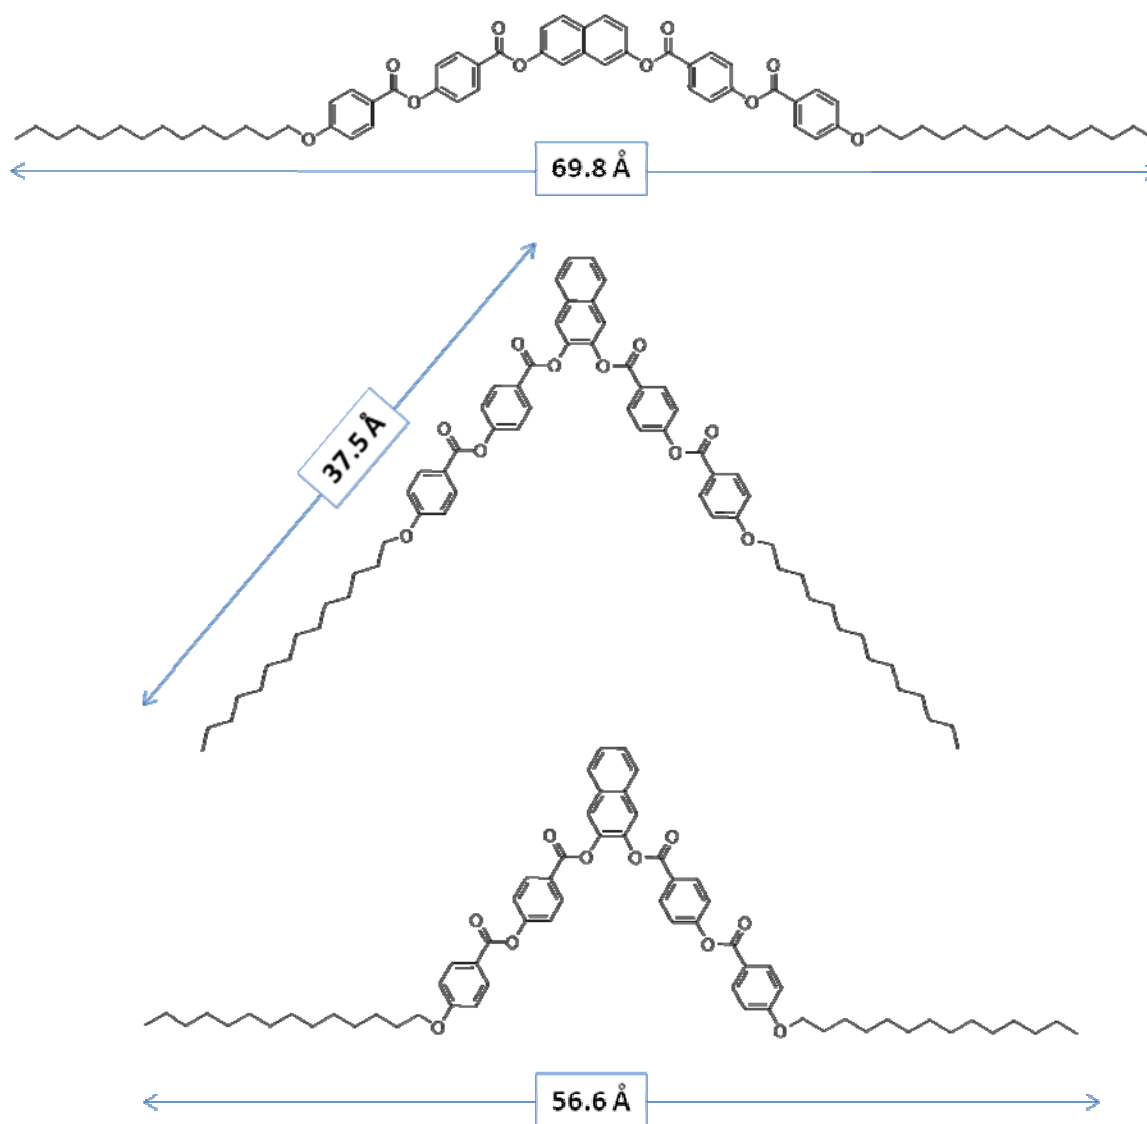

**Fig. 2.** Different conformations and molecular lengths of some of the naphthalene derivatives.

### 3. Switching curves of N(2,7)

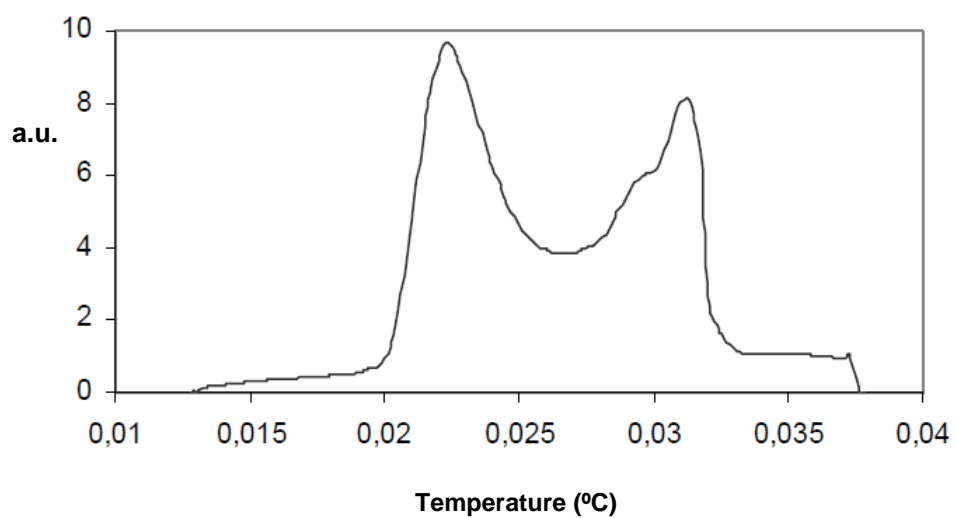

**Fig. 3.** Hemicycle of the polarization switching current for compound N(2,7) under a Triangular-wave electric field of 30 Hz at 150 V<sub>pp</sub> of a.c.

#### 4. DSC and x-ray diffractograms of selected compounds.

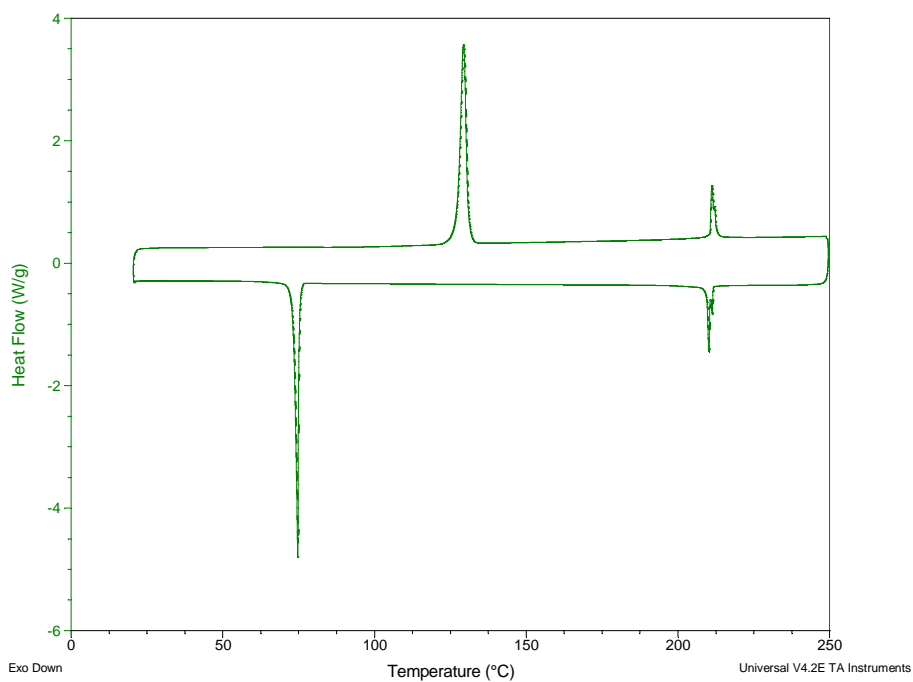

**Fig S4.** DSC curves of the second scan at 10°C/min of compound N(2,3).

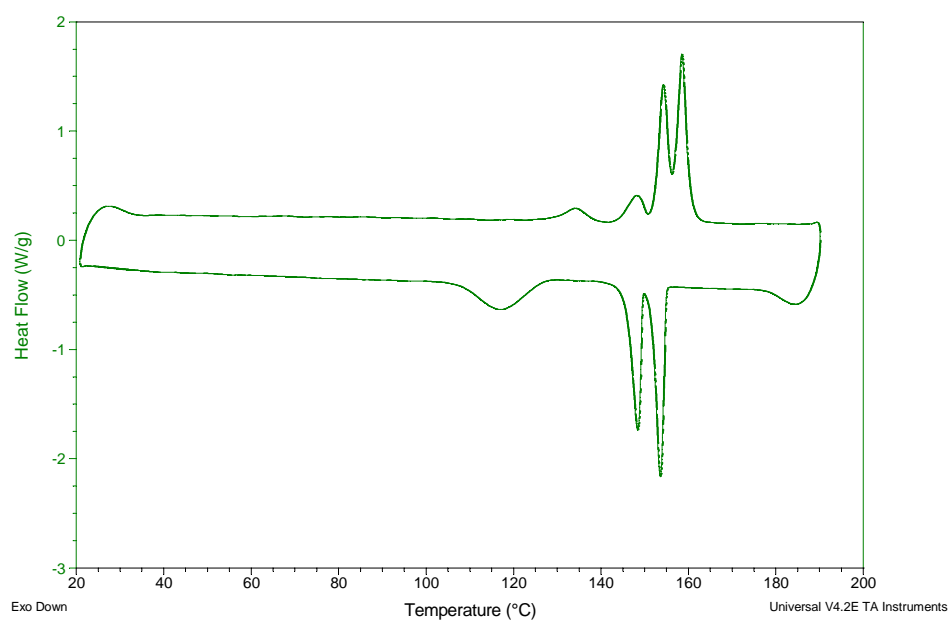

**Fig. S5.** DSC curves of the second scan at 10°C/min of compound **S**.

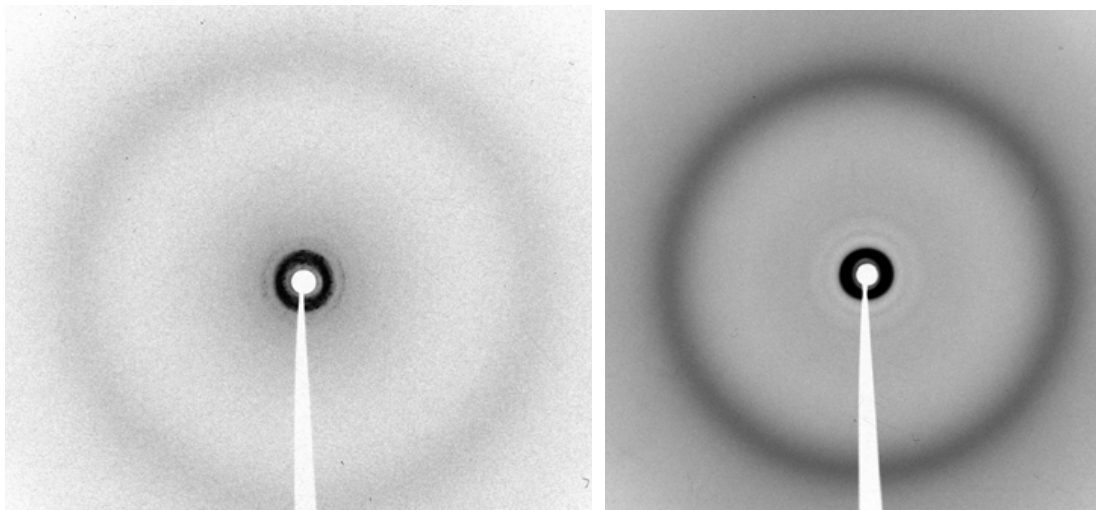

**Fig. S6.** X-ray diffractograms of the  $\text{Col}_r$  mesophase of compound **S** (left) and the SmCP mesophase of compound **N(2,7)** (right).
